# Supplementary material for: Dietary Supplementation of Methyl Cedryl Ether Ameliorates Adiposity in High-Fat Diet-Fed Mice
Source: MDPI journal article supplement (doi:10.3390/nu15030788), 2023-02-03
Supplement: s1 [file s1]

## **Supporting Information**

### **Dietary supplementation of methyl cedryl ether ameliorates adiposity in high-fat diet-fed mice**

Mengjie Li <sup>1,2,3</sup>, Seong-Gook Kang <sup>4</sup>, Kunlun Huang <sup>1,2,3</sup> and Tao Tong <sup>1,2,3,\*</sup>

<sup>1</sup> Key Laboratory of Precision Nutrition and Food Quality, Key Laboratory of Functional Dairy, Ministry of Education, College of Food Science and Nutritional Engineering, China Agricultural University, Beijing 100083, China

<sup>2</sup> Key Laboratory of Safety Assessment of Genetically Modified Organism (Food Safety), The Ministry of Agriculture and Rural Affairs of the P.R. China, Beijing 100083, China

<sup>3</sup> Beijing Laboratory for Food Quality and Safety, Beijing 100083, China

<sup>4</sup> Department of Food Engineering, Mokpo National University, Muangun 58554, Republic of Korea

\* Correspondence: tongtao1028@cau.edu.cn; Tel.: +86-10-6273-7244

**Table S1.** Primer sequences used for RT-qPCR.

| Type  | Gene Description                                                                                         | Sequences (5'→3')                                      |
|-------|----------------------------------------------------------------------------------------------------------|--------------------------------------------------------|
| Mouse | Peroxisome proliferator-activated receptor $\gamma 2$ ( <i>PPAR<math>\gamma 2</math></i> )               | F: TTCGGAATCAGCTCTGTGGA<br>R: CCATTGGGTCAGCTCTTGTG     |
|       | CCAAT/enhancer binding-protein $\alpha$ ( <i>C/EBP<math>\alpha</math></i> )                              | F: TCAGCTTACAACAGGCCAGG<br>R: ACACAAGGCTAATGGTCCCC     |
|       | Fatty acid synthase ( <i>FAS</i> )                                                                       | F: TTGCTGGCACTACAGAATGC<br>R: AACAGCCTCAGAGCGACAAT     |
|       | Peroxisome proliferator-activated receptor gamma coactivator 1-alpha ( <i>PGC-1<math>\alpha</math></i> ) | F: TAAATCTGCGGGATGATGGA<br>R: GTTTCGTTCGACCTGCGTAA     |
|       | Uncoupling protein 1 ( <i>UCPI</i> )                                                                     | F: GGTTTGCACCACACTCCTG<br>R: ACATGGACATCGCACAGCTT      |
|       | PR domain containing 16 ( <i>PRDM16</i> )                                                                | F: CCACCAGCGAGGACTTCAC<br>R: GGAGGACTCTCGTAGCTCGAA     |
|       | Cytochrome c ( <i>Cytc</i> )                                                                             | F: ACACTGTGGAAAAGGGAGGC<br>R: GCACTGGTTAACCCAAGCAA     |
|       | Cytochrome c oxidase subunit 4 ( <i>COX4</i> )                                                           | F: GTACCGCATCCAGTTTAACGA<br>R: CCATACACATAGCTCTTCTCCCA |
|       | Cell death activator CIDE-A ( <i>Cidea</i> )                                                             | F: GGAATCTGCTGAGGTTTATG<br>R: ATCCCACAGCCTATAACAGA     |
|       | 3-hydroxy-3-methylglutaryl-Coenzyme A synthase 1 ( <i>Hmgcs1</i> )                                       | F: GCCGTGAACTGGGTCGAA<br>R: GCATATATAGCAATGTCTCCTGCAA  |
|       | stearoyl-Coenzyme A desaturase 2 ( <i>Scd2</i> )                                                         | F: AGTATTGCCACCCAGATGCT<br>R: GTGGGGCACGAACCTTTACT     |

|                                                      |                             |
|------------------------------------------------------|-----------------------------|
| cytochrome P450 family 4 subfamily A                 | F: CCACTCATTCCTGCCCTTC      |
| polypeptide 12B ( <i>Cyp4a12b</i> )                  | R: TCAGCTCATTCATCGCAAAC     |
| acetyl-Coenzyme A acyltransferase 1B                 | F: ATGGGAATATTTCTTCCCGC     |
| ( <i>Acaa1b</i> )                                    | R: ATTAAAGTGCTGTGACACAC     |
| solute carrier family 27 member 1 ( <i>Slc27a1</i> ) | F: AGCCTGGTCAAGTTCTGTTCTGGA |
|                                                      | R: AGAAGAGTCGATCATCCATGCCCT |
| acyl-CoA synthetase long-chain family                | F: CAGAGGAACTCAACTACTGGACC  |
| member 6 ( <i>Acs16</i> )                            | R: CCAATGTCTCCAGTGTGAAGCC   |
| acyl-CoA synthetase bubblegum family                 | F: ACTCGCAAACCAGCTCCTT      |
| member 1 ( <i>Acsbg1</i> )                           | R: CCGGGTTGTCCATAGTGCTT     |
| acyl-CoA synthetase bubblegum family                 | F: ATGCCTCCAACAGATCAGCC     |
| member 2 ( <i>Acsbg2</i> )                           | R: TGTTTTGGGCTCTGGGTGTT     |
| acyl-CoA synthetase bubblegum family                 | F: AACCCGTATCCCATCGAGGA     |
| member 3 ( <i>Acsbg3</i> )                           | R: CTTCGAAGCTTCCGACAGCA     |
| Glyceraldehyde-3-phosphate dehydrogenase             | F: GTGATGGCATGGACTGTGGT     |
| ( <i>GAPDH</i> )                                     | R: GGAGCCAAAAGGGTCATCAT     |

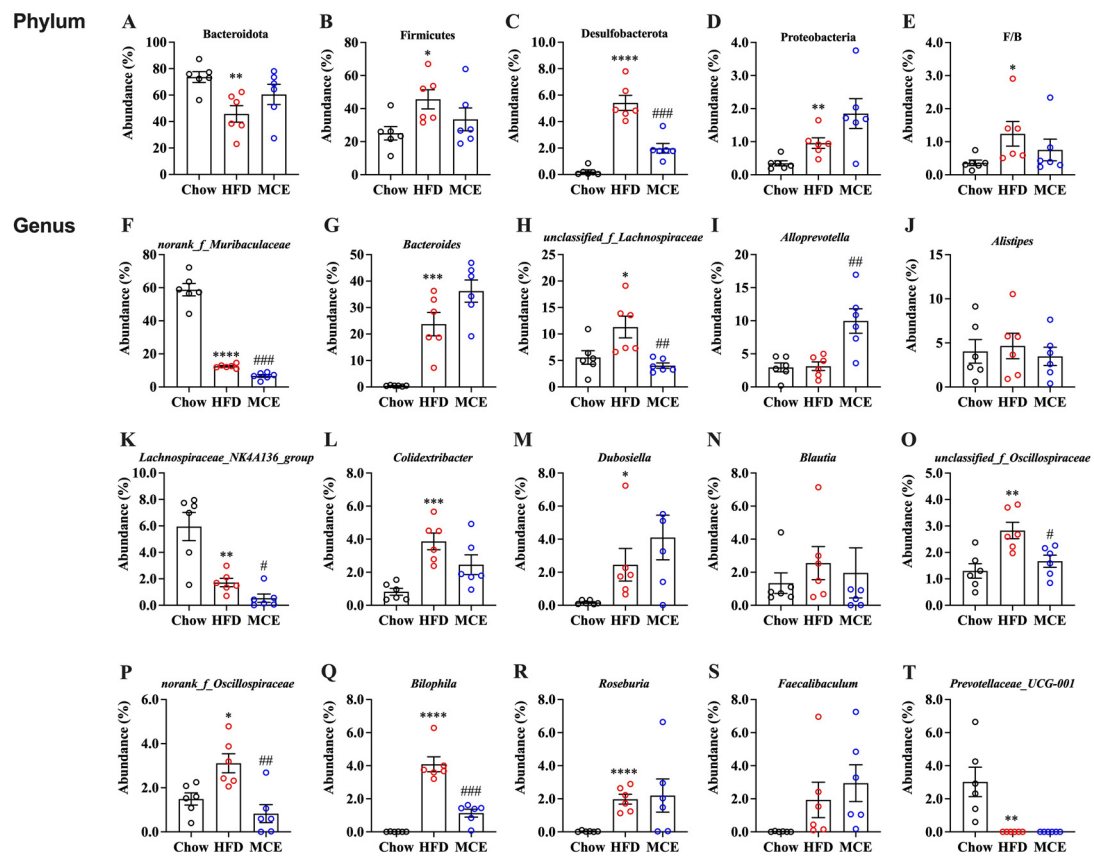

**Figure S1.** The relative abundance of gut microbiota at phylum (A-E) and genus (F-T) levels. \* $p < 0.05$  versus chow group, \*\* $p < 0.01$  versus chow group, \*\*\* $p < 0.001$  versus chow group, \*\*\*\* $p < 0.0001$  versus chow group; # $p < 0.05$  versus HFD group, ## $p < 0.01$  versus HFD group, ### $p < 0.001$  versus HFD group.
